# Supplementary material for: Field Determination of Phosphate in Environmental Water by Using a Hand‐Powered Paper Centrifuge for Preconcentration and Digital Image Colorimetric Sensing
Source: Hindawi journal article supplement (doi:10.1155/2022/7359197), 2022-01-01
Supplement: f1 [file 7359197.f1.pdf]

## Supplementary Information

Field determination of phosphate in environmental water by using a hand-powered paper centrifuge for preconcentration and digital image colorimetric sensing

Zhen Pan<sup>#</sup>, Xiaozhan Nong<sup>#</sup>, Yajing Xie, Yan Li, Hui Zeng\*, Ying Liang, Min Zhang\*

School of Life and Environmental Sciences, Guilin University of Electronic Technology, Guilin, Guangxi, 541004

\* Corresponding authors.

<sup>#</sup> These individuals (Z. Pan and X. Nong) had equal contributions to this work.

Email address:

[zhangmin@guet.edu.cn](mailto:zhangmin@guet.edu.cn) (M. Zhang)

[guetzenghui@foxmail.com](mailto:guetzenghui@foxmail.com) (H. Zeng)

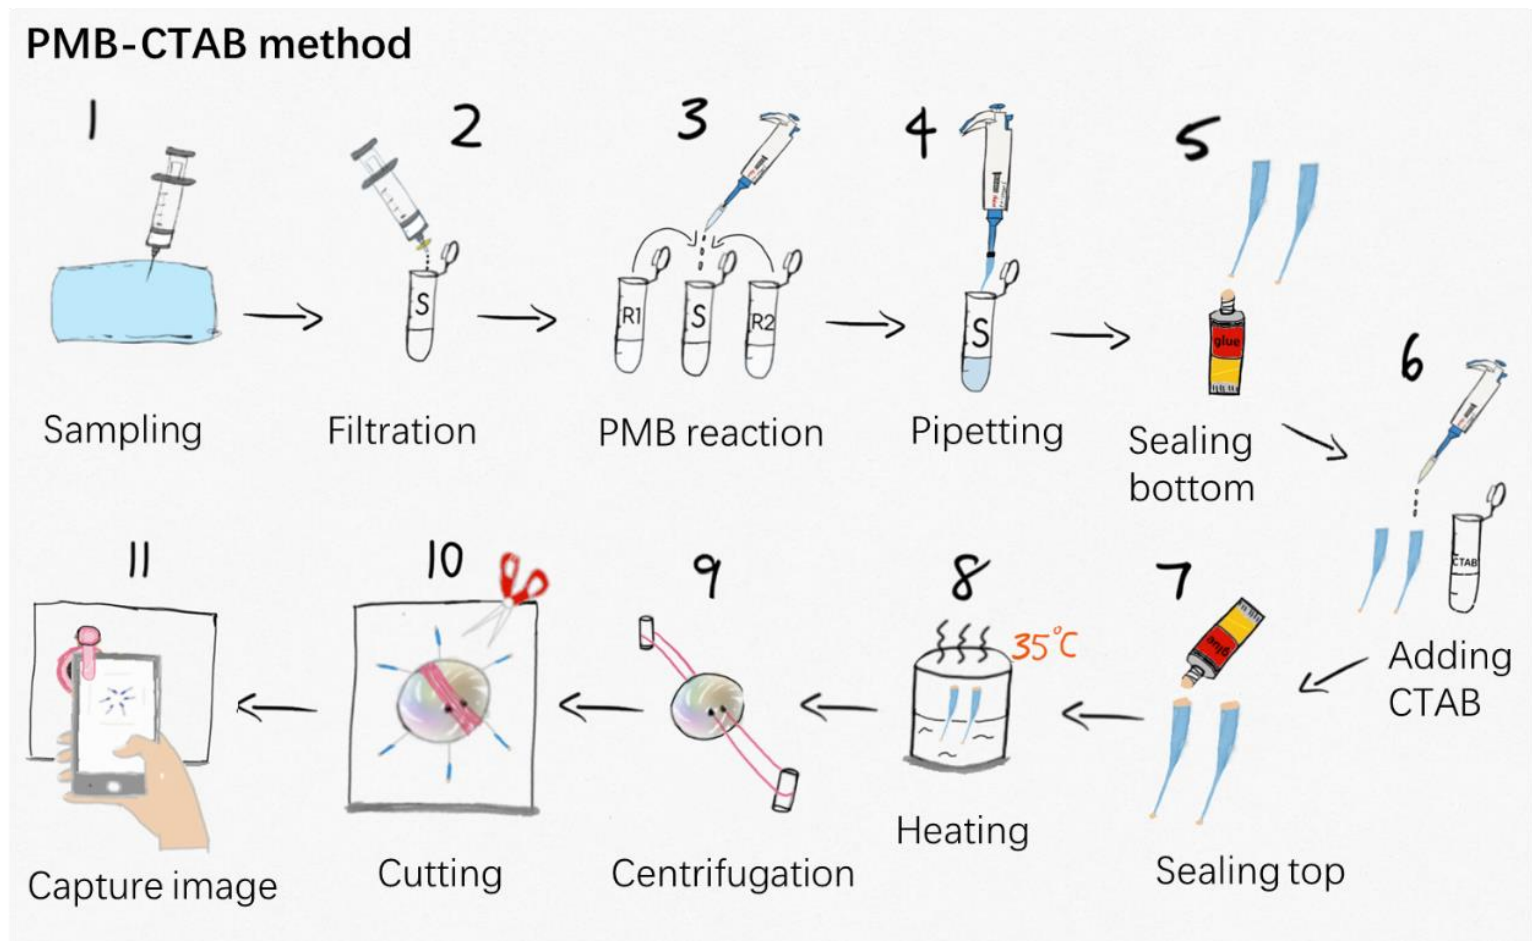

Figure S1. Schematic illustration of field preconcentration and digital image colorimetric sensing of phosphate by the PMB-CTAB method.

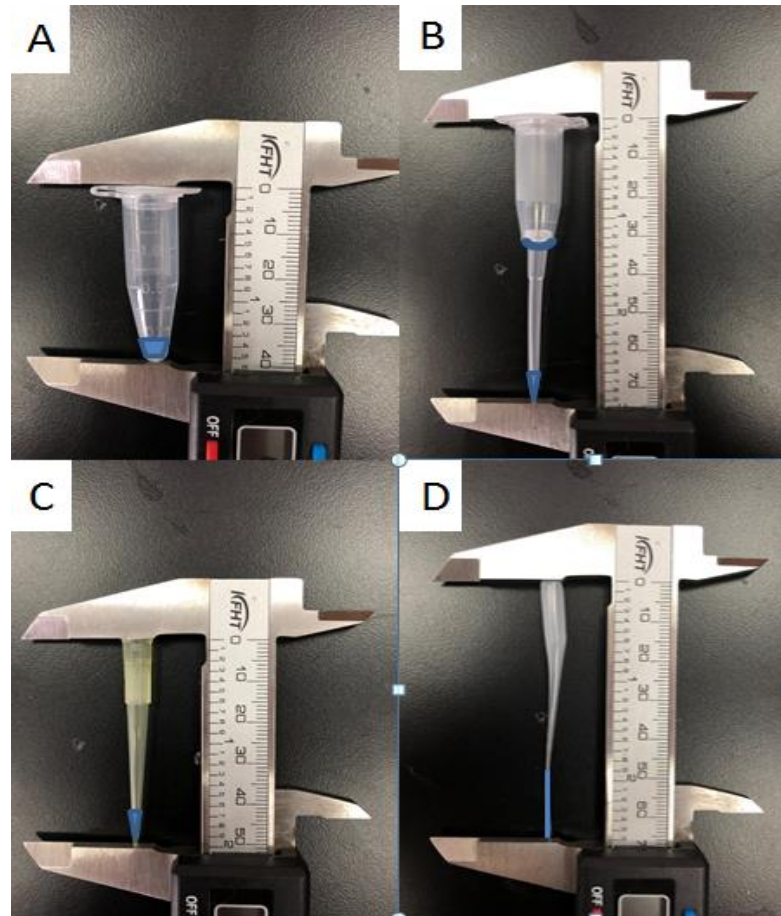

Figure S2. Centrifuge tubes used in this study. Blue blocks indicate the position of precipitate.
